# Supplementary material for: Control of the interface graphitized/amorphous carbon of biomass-derived carbon microspheres for symmetric supercapacitors
Source: Royal Society of Chemistry journal article supplement (doi:10.1039/d1na00262g), 2021-01-01
Supplement: d1na00262g1.pdf [file d1na00262g1.pdf]

## **Supporting information**

### **Interface graphitized/amorphous control of biomass-derived carbon microspheres for symmetric supercapacitor**

Hongqiang Wang, Xin Li, Jiming Peng, Yezheng Cai\*, Juantao Jiang\*, Qingyu Li

Guangxi Key Laboratory of Low Carbon Energy Materials, School of Chemistry and Pharmaceutical Sciences, Guangxi Normal University, Guilin, 541004, China.

\*Corresponding authors

yezhengcai@163.com

jtjiang@gxnu.edu.cn

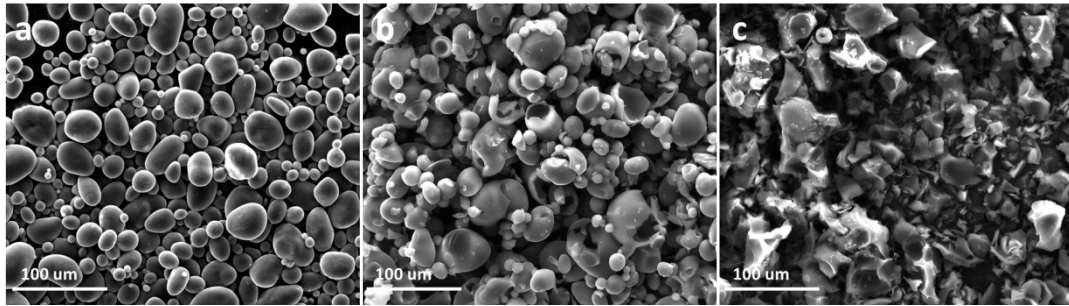

Fig. S1 SEM images of SC samples obtained at different heating rates of 0.2 °C/min (a), 0.5 °C/min (b), and 1 °C/min (c).

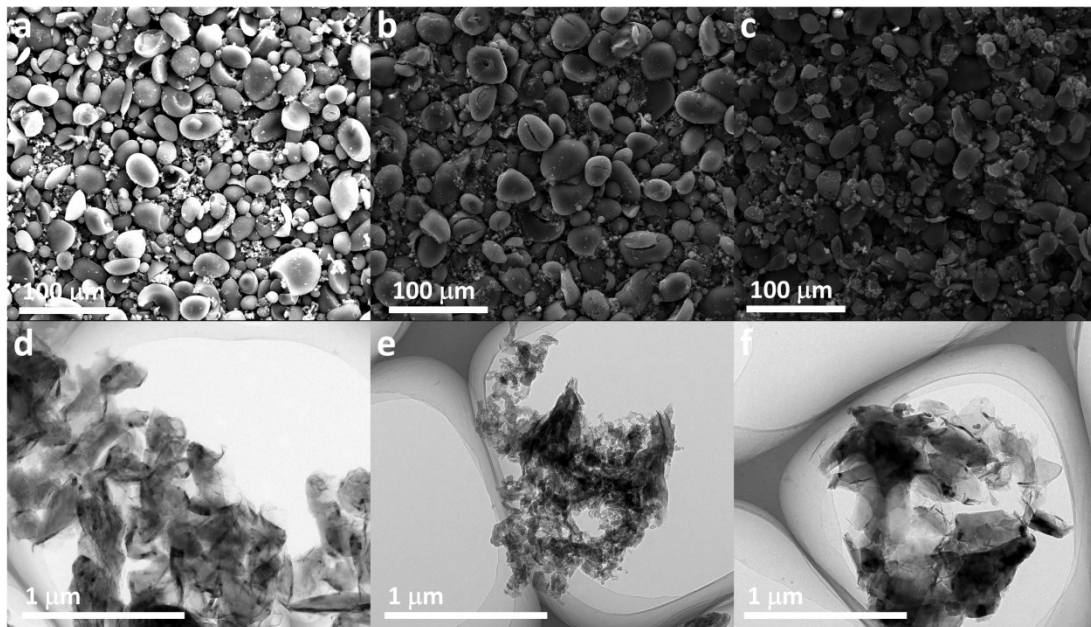

Fig.S2 SEM and TEM images of (a,d) GASC-Fe, (b,e) GASC-Co, and (c,f) GASC-Ni.

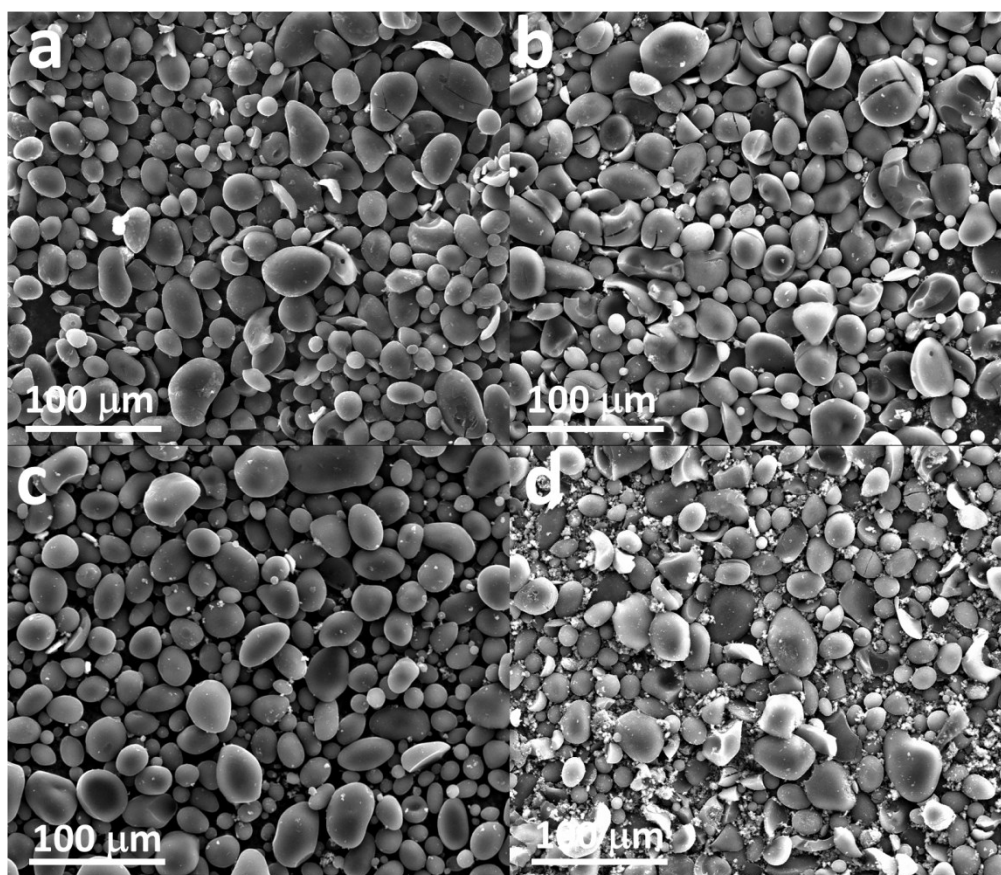

Fig.S3 SEM images of (a) AC, (b) GASC05, (c) GASC10, and (d) GASC15.

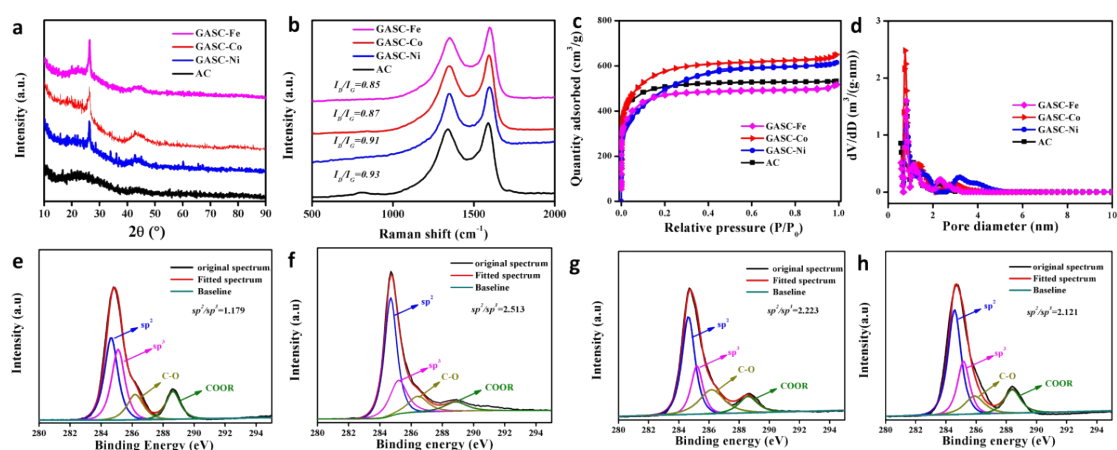

Fig. S4 (a) XRD patterns, (b) Raman spectra, (c) N<sub>2</sub> adsorption–desorption isotherms, (d) pore size distributions of AC, GASC-Fe, GASC-Co, and GASC-Ni; (e-h) High-resolution C 1s spectrum of AC (e), GASC-Fe (f), GASC-Co (g), and GASC-Ni (h).

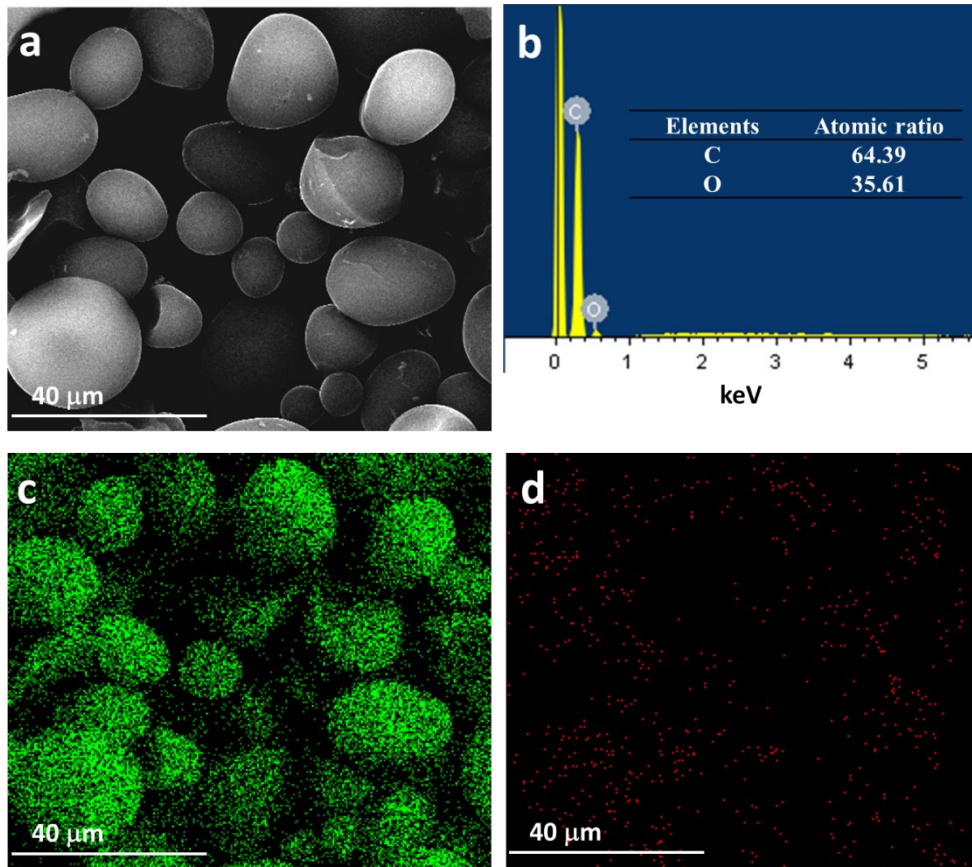

Fig.S5 (a) SEM image, (b) EDS spectra, and (c, d) element mapping distributions of AC.

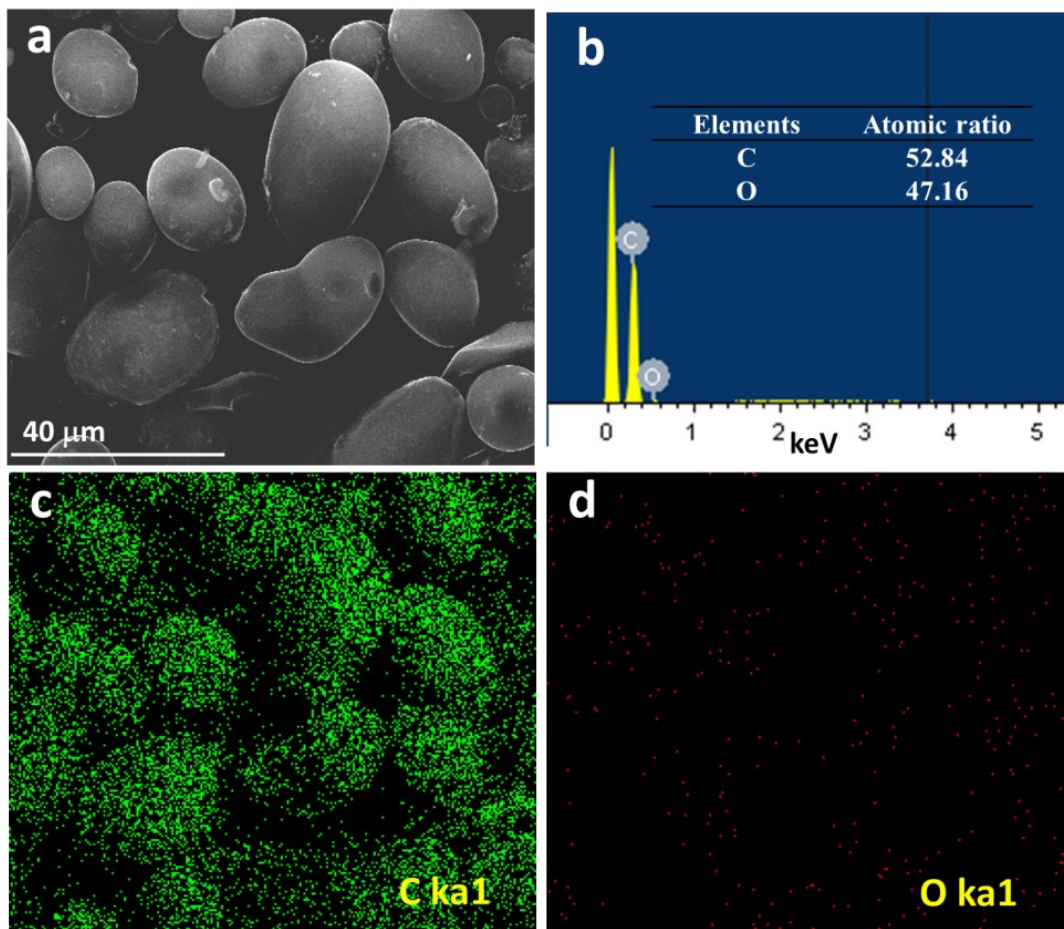

Fig.S6 (a) SEM image, (b) EDX spectra, and (c, d) element mapping distributions of GASC10.

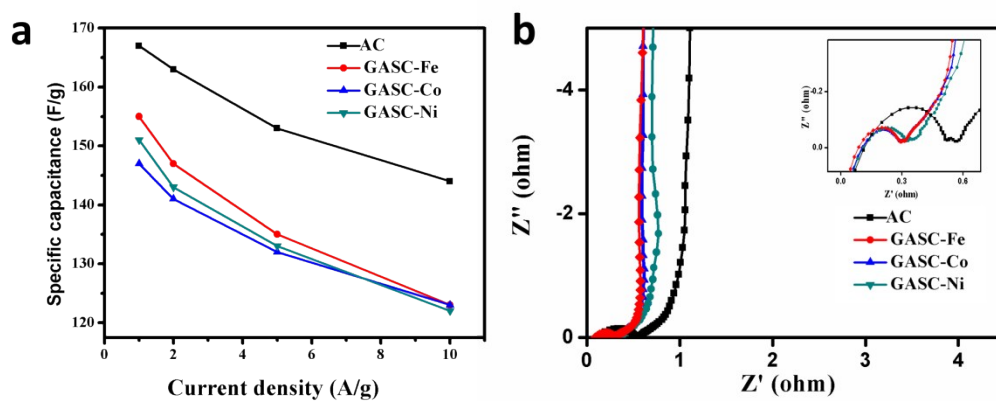

Fig. S7 (a) Specific capacitances at various current densities and (b) Nyquist plots of AC, GASC-Fe, GASC-Co, and GASC-Ni SSCs.

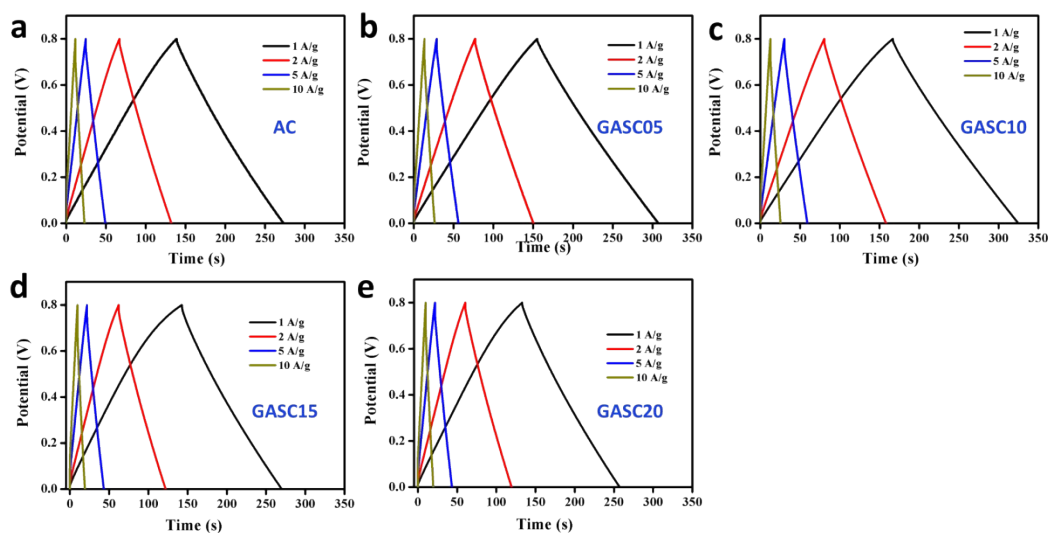

Fig. S8 GCD curves of AC, GASC05, GASC10, GASC15, and GASC20 SSCs at different current densities.

Table S1 XRD, R<sub>man</sub>, XPS, resistivity, and N<sub>2</sub> adsorption-desorption measurements results of different samples.

| Samples | $d_{002}$<br>(Å) | $I_D/I_G$ | $sp^2/sp^3$ | Resistivity<br>(Ω·cm) | $S_{BET}$<br>(m <sup>2</sup> /g) | $V_{tot}$<br>(cm <sup>3</sup> /g) | $V_{mic}$<br>(cm <sup>3</sup> /g) | $V_{mes}$<br>(cm <sup>3</sup> /g) |
|---------|------------------|-----------|-------------|-----------------------|----------------------------------|-----------------------------------|-----------------------------------|-----------------------------------|
| AC      | -                | 0.93      | 1.179       | 1.536                 | 1912                             | 0.82                              | 0.76                              | 0.06                              |
| GASC-Fe | 3.365            | 0.85      | 2.513       | 0.131                 | 1744                             | 0.80                              | 0.72                              | 0.08                              |
| GASC-Co | 3.479            | 0.87      | 2.223       | 0.138                 | 2117                             | 1.01                              | 0.91                              | 0.10                              |
| GASC-Ni | 3.482            | 0.91      | 2.121       | 0.140                 | 1775                             | 0.95                              | 0.87                              | 0.08                              |
| GASC05  | -                | 0.92      | 1.573       | 0.331                 | 1954                             | 0.95                              | 0.79                              | 0.16                              |
| GASC10  | 3.378            | 0.91      | 2.271       | 0.187                 | 2369                             | 1.08                              | 0.97                              | 0.11                              |
| GASC15  | 3.370            | 0.90      | 2.366       | 0.165                 | 2119                             | 1.10                              | 1.01                              | 0.09                              |
